# Supplementary material for: Prevalence of Antiphospholipid Antibodies and Association With Incident Cardiovascular Events
Source: PubMed Central journal article supplement (PMC10074226; doi:10.1001/jamanetworkopen.2023.6530), 2023-04-04
Supplement: jamanetwopen-e236530-s002.pdf [file jamanetwopen-e236530-s002.pdf]

## **Data Sharing Statement**

Zuo. Prevalence of Antiphospholipid Antibodies and Association With Incident Cardiovascular Events. *JAMA Netw Open*. Published April 04, 2023. doi:10.1001/jamanetworkopen.2023.6530

### **Data**

**Data available:** No
